# Supplementary material for: Synthesis of europium-doped ZnS nano-crystalline thin films with strong blue photoluminescence
Source: Royal Society of Chemistry journal article supplement (doi:10.1039/c6ra24300b), 2016-01-01

Fig. S1 Home-made ultrasonic spray pyrolysis system used for the deposition of ZnS:Eu<sup>2+</sup> and ZnS thin films.

Fig. S2 AFM micrographs images of the ZnS:Eu<sup>2+</sup> film with different zooms. It is observe that the hexagonal agglomerates are composed of smaller grains.

Fig. S3 Screen captures of the Winspace Processing program from Jeol, showing the size of the grains evaluated in different zones of the ZnS:Eu<sup>2+</sup> film. The size is given by the length pointed by arrows

Fig. S1

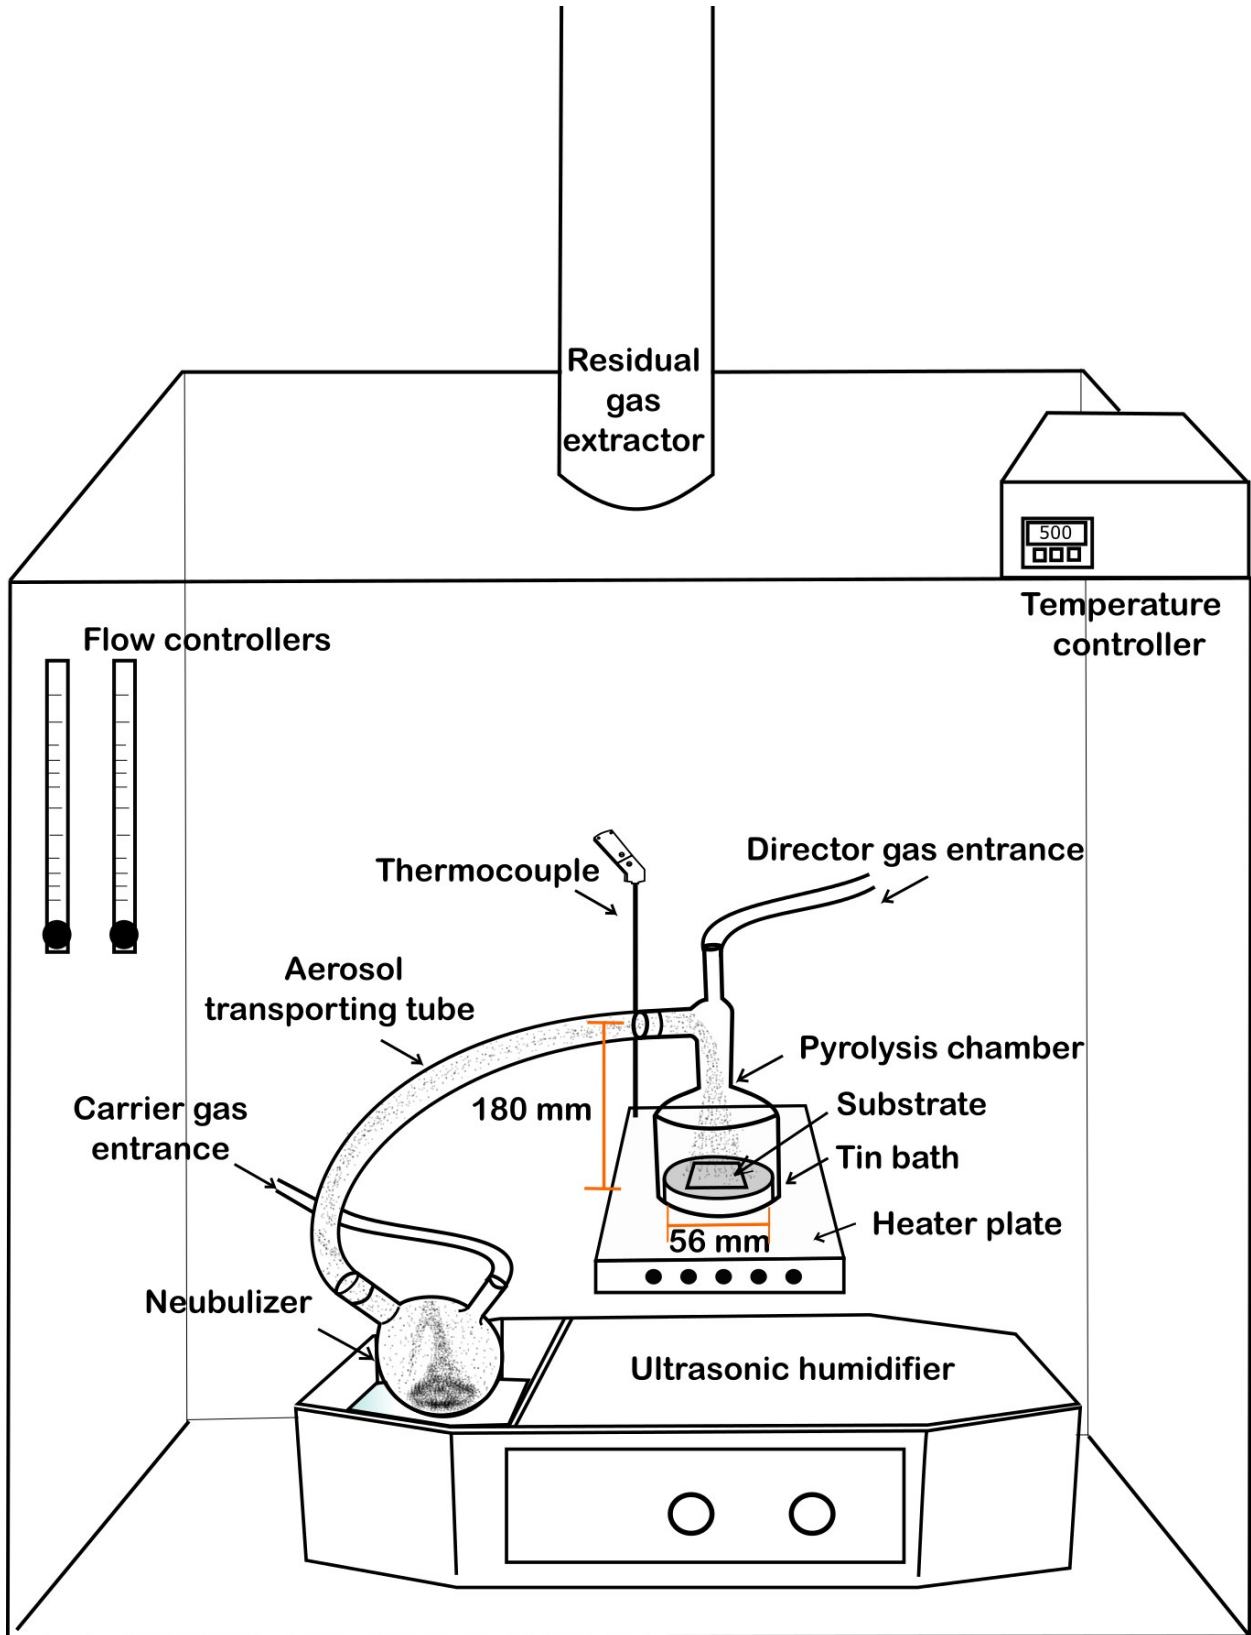

Fig. S2

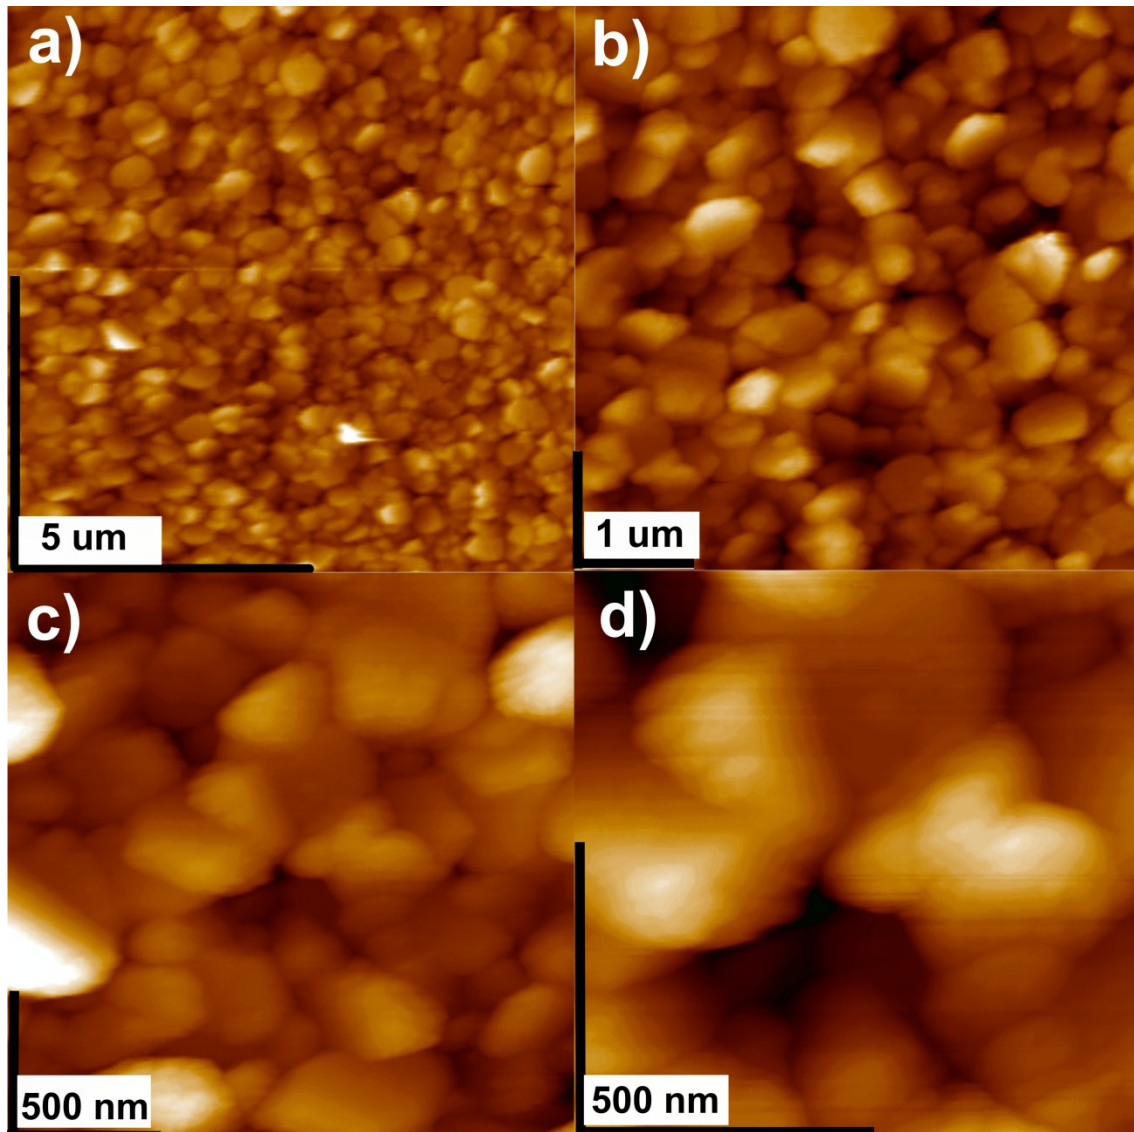

Fig. S3

# Zone 1

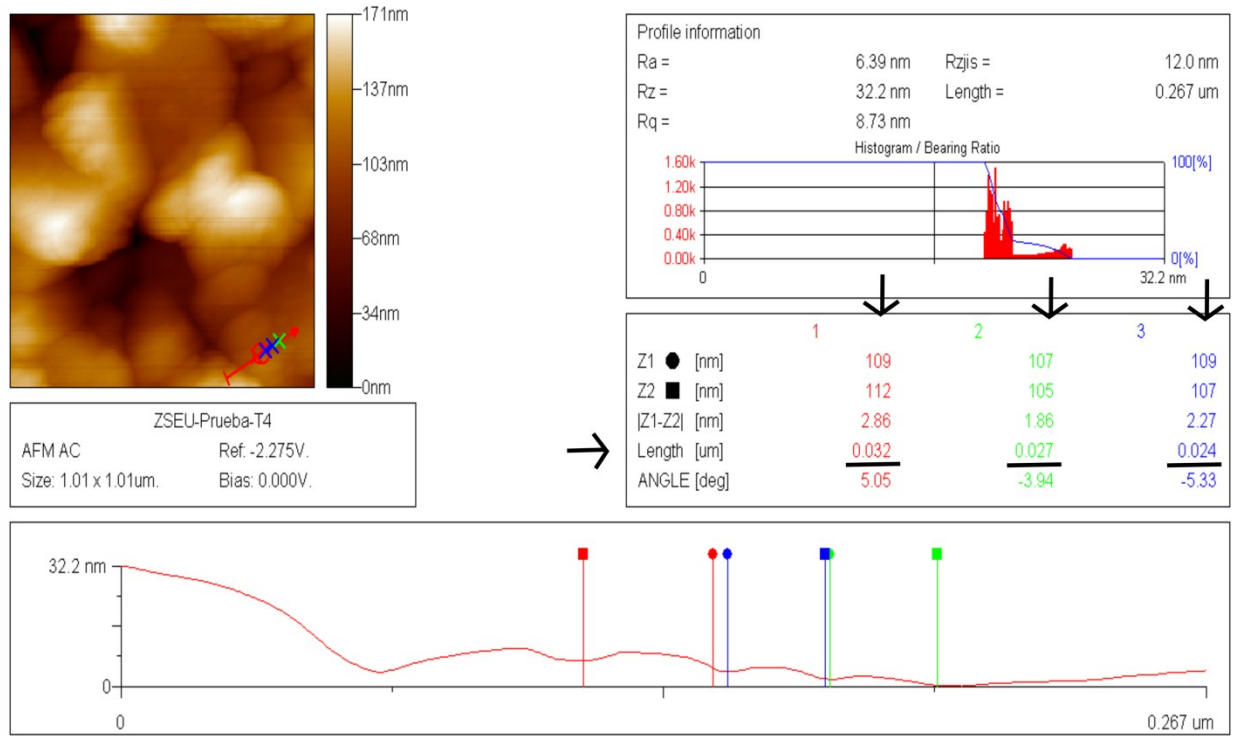

# Zone 2

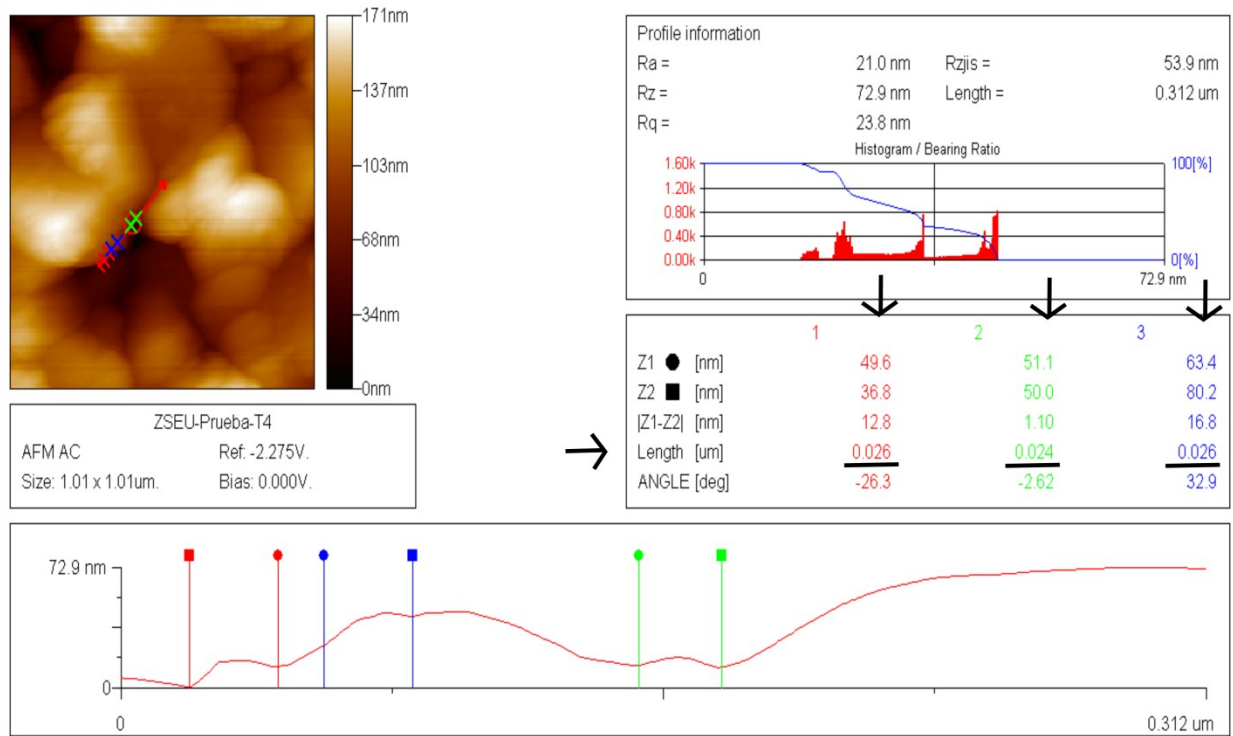

Supplement: c6ra24300b1.pdf [file c6ra24300b1.pdf]
